# Supplementary figures and images for: Reduced cortical thickness with increased lifetime burden of PTSD in OEF/OIF Veterans and the impact of comorbid TBI
Source: PubMed Central journal article supplement — Neuroimage Clin. 2013 Apr 22;2:601–11. doi: 10.1016/j.nicl.2013.04.009 (PMC3777819; doi:10.1016/j.nicl.2013.04.009), 2013-04-22

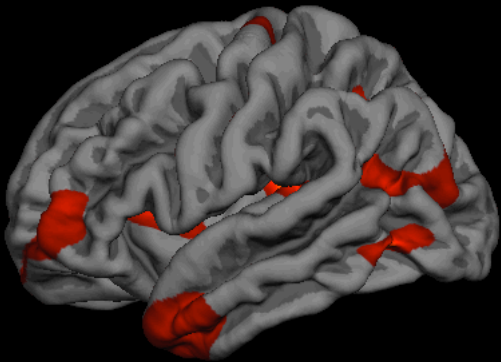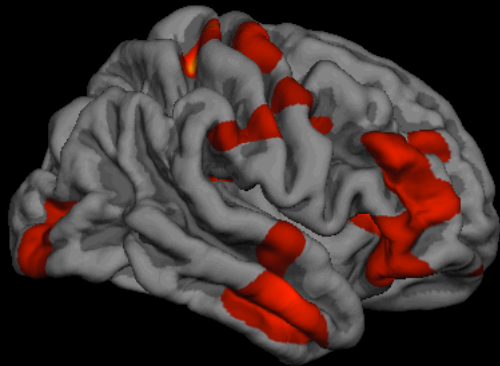

Supplement: mmc3.pdf [file mmc3.pdf]
